# Supplementary material for: A multi-enhancer RET regulatory code is disrupted in Hirschsprung disease
Source: HighWire-hosted journal article supplement (doi:10.1101/gr.275667.121), 2021-11-15
Supplement: Supplemental_Files.pdf [file Supplemental_Files.pdf]

## **SUPPLEMENTAL FILES**

### **A multi-enhancer *RET* regulatory code is disrupted in Hirschsprung disease**

Sumantra Chatterjee, Kameko M Karasaki, Lauren E Fries, Ashish Kapoor and  
Aravinda Chakravarti

| SNP ID                 | Risk Allele | Risk Allele Frequency in old cases (n=220) | Risk Allele Frequency in new cases (n=235) | Risk Allele Frequency in 1000G (n=503) | Risk Allele Frequency gnomAD (n=9400) |
|------------------------|-------------|--------------------------------------------|--------------------------------------------|----------------------------------------|---------------------------------------|
| rs788263               | G           | 0.63                                       | 0.59                                       | 0.39                                   | 0.39                                  |
| rs788261               | C           | 0.63                                       | 0.59                                       | 0.39                                   | 0.39                                  |
| rs788260 <sup>+</sup>  | A           | 0.63                                       | 0.59                                       | 0.39                                   | 0.39                                  |
| rs1547930              | G           | 0.87                                       | 0.85                                       | 0.76                                   | 0.77                                  |
| rs7069590              | T           | 0.94                                       | 0.84                                       | 0.75                                   | 0.78                                  |
| rs2435357              | T           | 0.67                                       | 0.66                                       | 0.25                                   | 0.29                                  |
| rs12247456             | G           | 0.83                                       | 0.84                                       | 0.67                                   | 0.69                                  |
| rs7393733              | G           | 0.83                                       | 0.83                                       | 0.67                                   | 0.69                                  |
| rs2506024 <sup>+</sup> | A           | 0.82                                       | 0.82                                       | 0.59                                   | 0.60                                  |

**Supplemental Table S1:** Case and control frequencies of the risk allele for 10 HSCR associated SNPs showing allelic difference in reporter assays and within CREs regulating *RET* gene expression. The new case allele frequencies were obtained from a genotyping study of short segment HSCR cases in 235 European ancestry individuals (Kapoor et al. 2021) and the new control frequencies were obtained from 9,400 European ancestry individuals in gnomAD (Karczewski et al. 2020). There was no overlap between new and old cases and controls.

+ The SNPs rs788260 and rs2506024 are perfect proxies ( $r^2 = 1$ ) for rs2506030 and rs2505441 respectively which were not genotyped in our new assays.

| Enhancer           | Percentage of cells with no deletion | Percentage of cells with 1-3 bp deletion | Percentage of cells with >3 bp deletion |
|--------------------|--------------------------------------|------------------------------------------|-----------------------------------------|
| E2                 | 30                                   | 52                                       | 18                                      |
| E4                 | 68                                   | 22                                       | 10                                      |
| E5                 | 100                                  | 0                                        | 0                                       |
| E14                | 69                                   | 20                                       | 11                                      |
| E26                | 42                                   | 24                                       | 34                                      |
| E27                | 72                                   | 15                                       | 13                                      |
| E28                | 63                                   | 13                                       | 24                                      |
| RET-7              | 80                                   | 5                                        | 15                                      |
| RET-5.5            | 60                                   | 7                                        | 33                                      |
| RET+3              | 61                                   | 20                                       | 19                                      |
| E2+E4              | 71                                   | 22 <sup>a</sup>                          | 7 <sup>a</sup>                          |
| E26+E27+E28        | 65                                   | 18 <sup>a</sup>                          | 17 <sup>a</sup>                         |
| R3+E26<br>+E27+E28 | 75                                   | 15 <sup>a</sup>                          | 10 <sup>a</sup>                         |

**Supplemental Table S2:** Percentage of cells carrying deletions of various length calculated using *Inference of CRISPR Edits (ICE)* tool (Hsiau et al., 2019). Nucleotides surrounding the HSCR associated polymorphisms in all enhancers were successfully deleted except for enhancer 5. <sup>a</sup> The number represents the percent of deletion for pool of cells for each independent enhancer region.

| Enhancer | Guide RNA Sequence    |
|----------|-----------------------|
| E2       | TAAACCGTTAAGTAATGACC  |
| E4       | TGGGACTCATCTGTGCACGG  |
| E5       | AGTGAGCCAGCAAAGTGAAA  |
| E14      | CAGCCCGCCTCACTGCTCCA  |
| E26      | GTGCTGAGCAAACAAGCCTG  |
| E27      | GGCACCCCTGTAAGAGTGAGG |
| E28      | AGCCCCTGCCTCCACAGACA  |
| RET-7    | AGAAACCAGCAGAGCCACAT  |
| RET-5.5  | GTGAGAAGCTGAAAGAGTGT  |
| RET+3    | ACCCTTACATGGTCATCCAC  |

**Supplemental Table S3:** Sequences of the individual guide RNA targeting the HSCR associated polymorphisms in the 10 enhancers.

| Enhancer | Forward Primer         | Reverse Primer         | Amplicon Size |
|----------|------------------------|------------------------|---------------|
| E2       | CTTCAAACCGCACCCGCTCCTT | AGTGACGTCCTGCCTGCATCCT | 283           |
| E4       | AGCCTGAATCCAGCCACCAGGT | CTGCCCTGGGAGAGTGTCCACA | 417           |
| E5       | CAGCCAGCCCTCAGCACATGTC | AGAGTGACCTGCCAGCTCCCTG | 525           |
| E14      | AGCAGGCCTCTTGCTCAGAGCT | AGTGGGAGAGGCAGTCAGCTGG | 538           |
| E26      | TGCAGGTGGTCCTACCCGAGTG | GGAGTGTGAAAGGGCTGGGCAC | 339           |
| E27      | GTGCCCAGCCCTTTTCACTCC  | CCCCACCTCACTGCTCAGGTCA | 421           |
| E28      | TCGCATGAGGGGTTCTGCAGGA | CCATTACACACCACGGGGGCAC | 512           |
| RET-7    | CCCCTGCTCCGTGGAACCCTAA | CCTGGCAGTGCTCAACAGACGG | 455           |
| RET-5.5  | AGCCTGTGATGCTGGGCTCTCA | GCCAGAGCTGAGCTGGGAGACT | 349           |
| RET+3    | CTGGGGTAGGGCGAAAATGGGC | ACCCAGCCTTCTGCTCTGAGGG | 537           |

**Supplemental Table S4:** PCR primer sequences used for Sanger sequencing to detect CRISPR induced insertions and deletions surrounding the HSCR associated polymorphisms in the 10 enhancers.

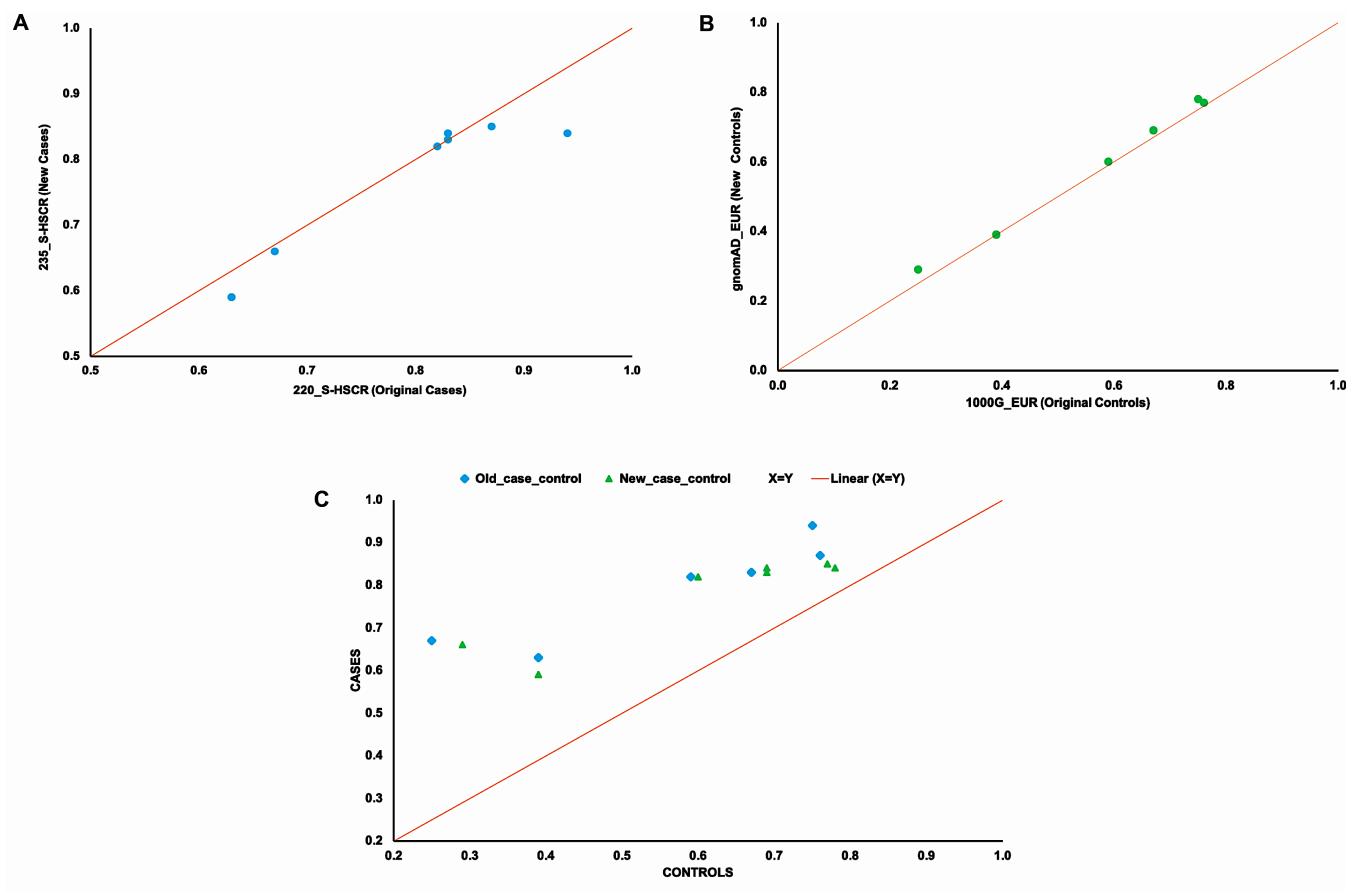

**Supplemental Figure S1:** Scatter plots comparing the allele frequencies of the risk allele for 10 HSCR associated functional SNPs in (A) original and new S-HSCR cases and (B) 1000 genome and gnomAD controls. (C) Scatter plot comparing case-control allele frequencies for both old and new, shows increase of all risk allele frequency in cases compared to controls.

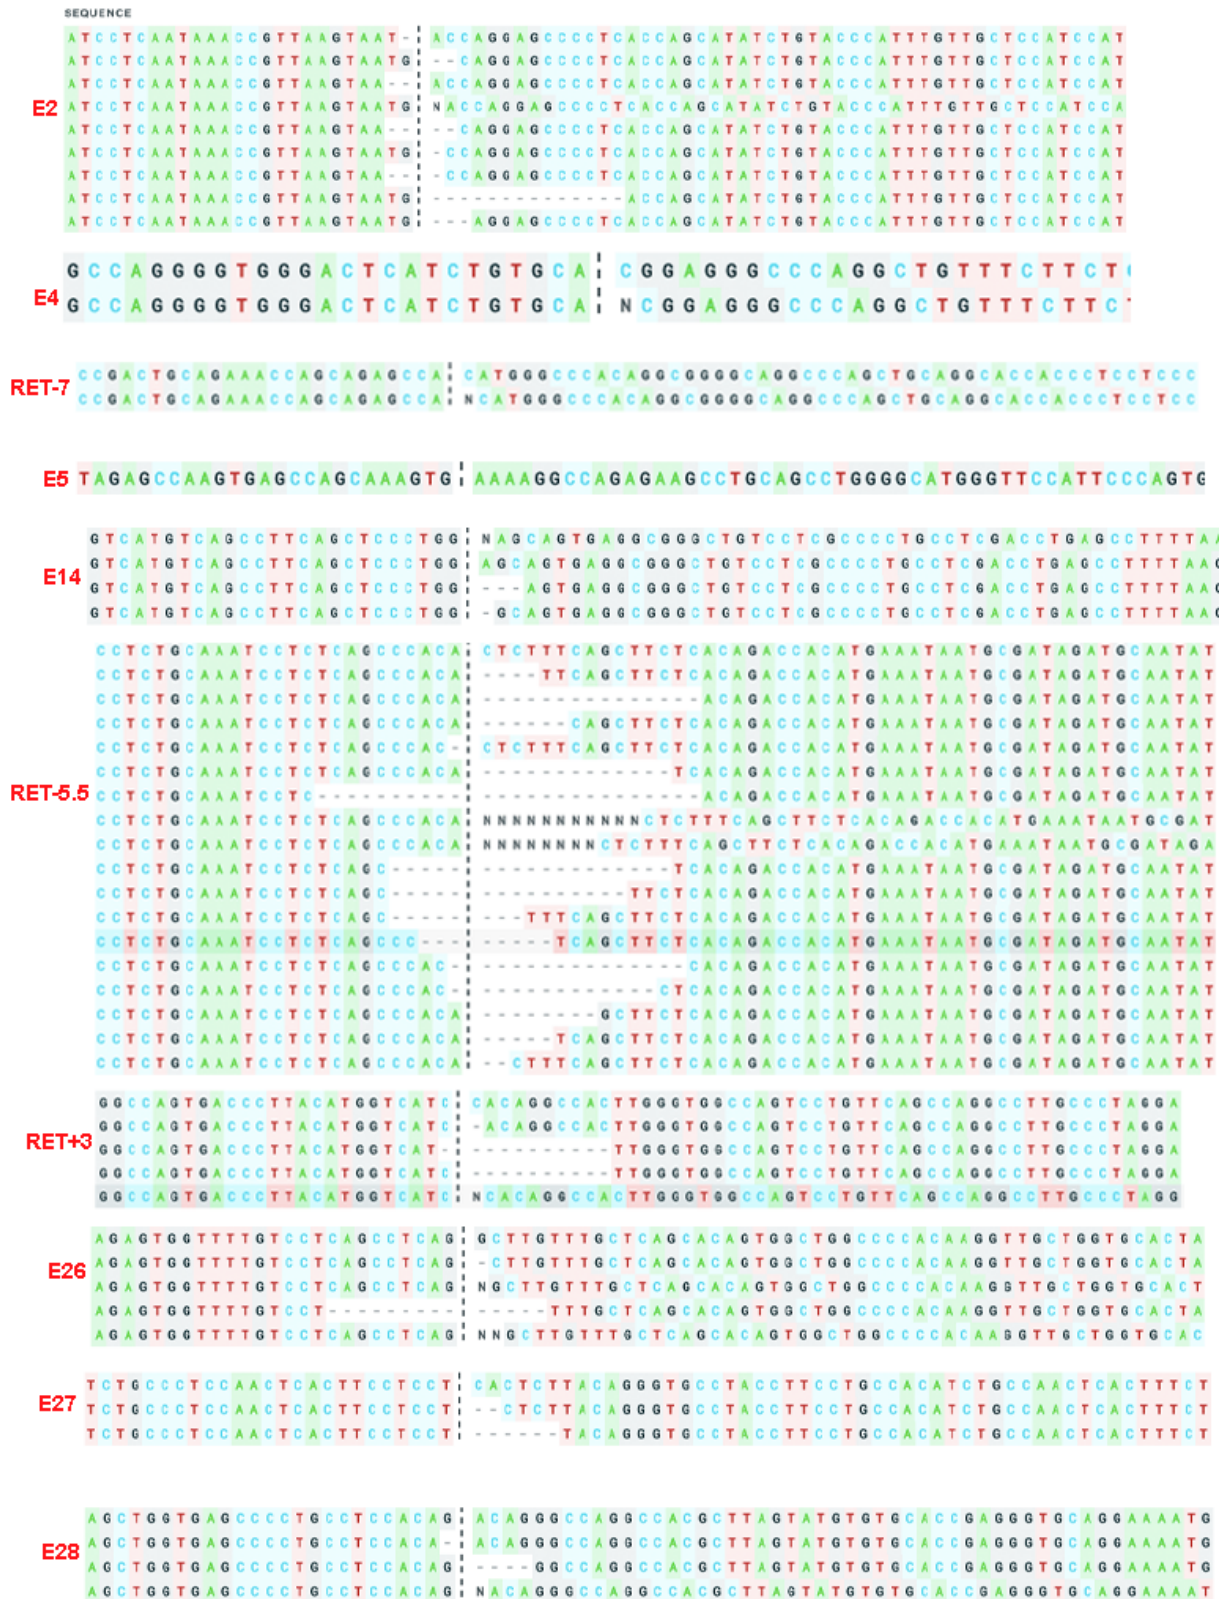

**Supplemental Figure S2:** Individual deletion of enhancer regions confirmed by Sanger sequencing of cells after single guide transfection. There are variable lengths of deletions in all our enhancer regions except E5 which did not have any insertion/deletion (INDEL)
